# Supplementary material for: High pheromone diversity in the male cheek gland of the red-spotted newt Notophthalmus viridescens (Salamandridae)
Source: PubMed Central journal article supplement (PMC4379952; doi:10.1186/s12862-015-0333-1), 2015-03-25
Supplement: 12862_2015_333_MOESM1_ESM.pdf [file 12862_2015_333_MOESM1_ESM.pdf]

**Additional file 1.** Primer combinations for SPF screening in *N. viridescens* tissues.

|           | primer combination         |      | primer sequence                                   | Reference              |
|-----------|----------------------------|------|---------------------------------------------------|------------------------|
| PCR       | SPF 1                      | For  | TYCTTACTCTMYTAGCACCATGAG                          | [18]                   |
|           |                            | Rev  | TCCTCSTCACAAAGAYCAGAC                             | [18]                   |
|           | SPF10                      | For  | CTTTGCTTTCATATCTAGAGGAGAGTCACT                    | this study             |
|           |                            | Rev  | AATTTCTGCTCTGGAGACATTGACAT                        | this study             |
|           | SPF11                      | For  | AGACGAAGAYCAGATACTCMGGCG                          | this study             |
|           |                            | Rev  | AATTTCTGCTCTGGAGACATTGACAT                        | this study             |
|           | Housekeeping EF 1 $\alpha$ | For  | ATCGACAAGAGAACCATCGA                              | [23]                   |
|           |                            | Rev  | GTGATCATGTTCTTGATGAA                              | [23]                   |
| RACE-PCR* | SPF2                       | For  | CCTCCYGSAGACAACACNCCCAATGGA                       | [11]                   |
|           | SPF3                       | Rev  | TCACATWTGTATCCATTGGGNGTGTTGTC                     | [11]                   |
|           | SPF4                       | Rev  | CTTCACATWTGTATCCATTGGGNGTGTTGTC                   | [11]                   |
|           | SPF5                       | For  | AGGAAATGCWATTGWGTGYGAAG                           | [11]                   |
|           | SPF6                       | For  | GTAYKGA CTGCTCTGGTGAG                             | [11]                   |
|           | SPF7                       | For  | AGCTACAGGAAANKCTATTGWSTGTG                        | [11]                   |
|           | SPF8                       | For  | TAGTAYKGA CTGCTCTGGTGA                            | [11]                   |
|           | SPF9                       | Rev  | GCCGGTGCA YTCCATRGTTTC                            | this study             |
|           | Universal                  | UPM1 |                                                   | CTAATACGACTCACTATAGGGC |
|           | UPM2                       |      | CTAATACGACTCACTATAGGGCAAGCAGTGG<br>TATCAACGCAGAGT | n.a.                   |

\*used in combination with the Universal RACE primer kit (UPM1 and UPM2) included in the SMARTer RACE cDNA Kit (CLONTECH).
