# Supplementary material for: High pheromone diversity in the male cheek gland of the red-spotted newt Notophthalmus viridescens (Salamandridae)
Source: PubMed Central journal article supplement (PMC4379952; doi:10.1186/s12862-015-0333-1), 2015-03-25
Supplement: 12862_2015_333_MOESM2_ESM.pdf [file 12862_2015_333_MOESM2_ESM.pdf]

**Additional file 2.** Accession numbers of the individual SPF precursor in Figure 3 and Additional file 3.

| clone | GenBank nr. | clone | GenBank nr. | clone | GenBank nr. | clone | GenBank nr. |
|-------|-------------|-------|-------------|-------|-------------|-------|-------------|
| 1     | KM463896    | 28    | KP118913    | 55    | KP118896    | 82    | KP118951    |
| 2     | KM463916    | 29    | KP118914    | 56    | KP118897    | 83    | KP118952    |
| 3     | KM463901    | 30    | KP118915    | 57    | KP118898    | 84    | KP118950    |
| 4     | KM463902    | 31    | KP118902    | 58    | KP118899    | 85    | KP118954    |
| 5     | KM463899    | 32    | KP118903    | 59    | KP118928    | 86    | KP118955    |
| 6     | KM463900    | 33    | KP118943    | 60    | KP118941    | 87    | KM463875    |
| 7     | KM463903    | 34    | KP118905    | 61    | KP118940    | 88    | KM463888    |
| 8     | KM463897    | 35    | KP118910    | 62    | KP118900    | 89    | KM463876    |
| 9     | KM463904    | 36    | KP118929    | 63    | KP118901    | 90    | KM463889    |
| 10    | KM463911    | 37    | KP118930    | 64    | KP118895    | 91    | KM463884    |
| 11    | KM463909    | 38    | KP118933    | 65    | KM463868    | 92    | KM463892    |
| 12    | KM463905    | 39    | KP118931    | 66    | KM463869    | 93    | KP118918    |
| 13    | KM463906    | 40    | KP118934    | 67    | KM463870    | 94    | KM463893    |
| 14    | KM463908    | 41    | KP118932    | 68    | KM463871    | 95    | KM463895    |
| 15    | KP118904    | 42    | KP118937    | 69    | KM463874    | 96    | KP118917    |
| 16    | KP118906    | 43    | KP118938    | 70    | KM463873    | 97    | KP118924    |
| 17    | KP118944    | 44    | KP118939    | 71    | KM463880    | 98    | KP118922    |
| 18    | KP118908    | 45    | KP118948    | 72    | KP118916    | 99    | KP118923    |
| 19    | KP118909    | 46    | KP118949    | 73    | KP118919    | 100   | KP118925    |
| 20    | KP118935    | 47    | KM463907    | 74    | KM463879    | 101   | KM463878    |
| 21    | KP118911    | 48    | KM463912    | 75    | KM463882    | 102   | KM463883    |
| 22    | KP118936    | 49    | KM463914    | 76    | KM463872    | 103   | KM463886    |
| 23    | KP118946    | 50    | KM463915    | 77    | KM463881    | 104   | KM463894    |
| 24    | KP118947    | 51    | KM463913    | 78    | KP118920    | 105   | KM463891    |
| 25    | KP118907    | 52    | KM463910    | 79    | KP118921    | 106   | KP118926    |
| 26    | KP118945    | 53    | KM463898    | 80    | KP118953    | 107   | KM463877    |
| 27    | KP118942    | 54    | KP118912    | 81    | KP118927    | 108   | KM463887    |
