# Supplementary material for: High pheromone diversity in the male cheek gland of the red-spotted newt Notophthalmus viridescens (Salamandridae)
Source: PubMed Central journal article supplement (PMC4379952; doi:10.1186/s12862-015-0333-1), 2015-03-25
Supplement: 12862_2015_333_MOESM4_ESM.pdf [file 12862_2015_333_MOESM4_ESM.pdf]

**Additional file 4.** Accession numbers and tissue origin of SPF precursor sequences of other amphibian species used in the phylogenetic analyses.

| species                               | Accession number        | tissue               | database     |
|---------------------------------------|-------------------------|----------------------|--------------|
| <i>Lissotriton helveticus</i> 001-006 | KJ402326-KJ402331       | male abdominal gland | NCBI         |
| <i>Lissotriton helveticus</i> 008-010 | KJ402333-KJ402335       | male abdominal gland | NCBI         |
| <i>Lissotriton helveticus</i> 012-013 | KJ402337-KJ402338       | male abdominal gland | NCBI         |
| <i>Lissotriton helveticus</i> 015     | KJ402340                | male abdominal gland | NCBI         |
| <i>Lissotriton helveticus</i> 018     | KJ402343                | male abdominal gland | NCBI         |
| <i>Lissotriton helveticus</i> 020-021 | KJ402345-KJ402346       | male abdominal gland | NCBI         |
| <i>Lissotriton helveticus</i> 023-024 | KJ402348-KJ402349       | male abdominal gland | NCBI         |
| <i>Lissotriton helveticus</i> 028-032 | KJ402353-KJ402357       | male abdominal gland | NCBI         |
| <i>Ichthyosaura alpestris</i> 001-016 | KP849562-KP849577       | male abdominal gland | NCBI         |
| <i>Ichthyosaura alpestris</i> 018-023 | KP849579-KP849584       | male abdominal gland | NCBI         |
| <i>Ichthyosaura alpestris</i> 025-028 | KP849586-KP849589       | male abdominal gland | NCBI         |
| <i>Pleurodeles waltl</i> 009          | KM463930                | male cloacal tissue  | NCBI         |
| <i>Pleurodeles waltl</i> 010          | KM463931                | male cloacal tissue  | NCBI         |
| <i>Pleurodeles waltl</i> 011          | KM463932                | male cloacal tissue  | NCBI         |
| <i>Eurycea guttolineata</i>           | AAZ06338                | male mental gland    | NCBI         |
| <i>Aneides ferreus</i>                | AAZ06335                | male mental gland    | NCBI         |
| <i>Desmognathus ocoee</i>             | AAZ06329                | male mental gland    | NCBI         |
| <i>Plethodon stormi</i>               | DQ097067                | male mental gland    | NCBI         |
| <i>Ambystoma mexicanum</i> 001        | CN041146                | larval limb tissue   | NCBI         |
| <i>Ambystoma mexicanum</i> 002        | CN035733                | larval limb tissue   | NCBI         |
| <i>Ambystoma mexicanum</i> 003        | I1698676-GIB5VLK02G78TL | brain, blood, etc.   | SGP/Sal-site |
| <i>Ambystoma tigrinum</i>             | CN048649                | brain tissue         | NCBI         |
| <i>Silurana tropicalis</i> 001        | F6PQG9                  | n.a.                 | Uniprot      |
| <i>Silurana tropicalis</i> 002        | XP_002943341            | n.a.                 | NCBI         |
