# Supplementary material for: High pheromone diversity in the male cheek gland of the red-spotted newt Notophthalmus viridescens (Salamandridae)
Source: PubMed Central journal article supplement (PMC4379952; doi:10.1186/s12862-015-0333-1), 2015-03-25
Supplement: 12862_2015_333_MOESM5_ESM.pdf [file 12862_2015_333_MOESM5_ESM.pdf]

**Additional file 5.** Conserved cysteine patterns per SPF clade in *N. viridescens*.

|           |        | signal peptide                     | mature protein                                                                             |
|-----------|--------|------------------------------------|--------------------------------------------------------------------------------------------|
| clade1    | SFF032 | MKALLASISILFAFISRGNAIECEVCSGOASTD- | CSGELVT-CDQTVESQTAITDMTFEGLDGMYVISKNSDVGAK-NILYRVAAKDV--FYQQ-RVEVQTNQCNKGPLQFPKNTTLNG      |
| clades3,4 | SFF094 | MRAILAAVVMQLALITGADCLLCEQCFVVGSSQ- | CSGIFKQ-CDPDVTHCVKGMENSTLGRVVLSAF-KDCLNFSQKAAQGREFFHKDSALFFQITRT-CDSDFCNKRDEVPVAVDNTPNG    |
| clade2    | SFF063 | MKALLASVSILFAFISRGESLSCQCMNLNGAT-  | CSGNQRV-CEGYATRCDNTYMEFTRDGTSTTF-KGQAVEQK---@TNYFLSESLGGFQFRMQKSY@EKDN@NTRDLVPPRNTPNG      |
| clade1    | SFF032 |                                    | VK@PT@VVDGELS CESTEVLE@VGMATN@LYPAATFRNTAAPPVQTAFRG@TNAKFQAEQVPIGPPYTVQDVVT--LIV---S---KGV |
| clades3,4 | SFF094 |                                    | YKCED@FTTQSTGPTATGGIQCTGEQNTCGSFGGVARPGEVVRQISMKGCVSPDF---@DLFVPAATQ-VYNYDLL---@SPAQKL     |
| clade2    | SFF063 |                                    | VR@PK@YAENATS @QSYETME@TGLETK@MDFGGKIRKYDQILTVASMN-@VNEEP---@NQPIMY@SDGPAVEIDHFR-@SDGEEKYS |
